# Supplementary material
Source: Springer Nature journal article supplement (https://www.springermedizin.de/resource/supplementary/12885_2012_3736_MOESM2_ESM.pdf/9465440)

**a) KRAS wild-type ( $p=0.0005$ )**

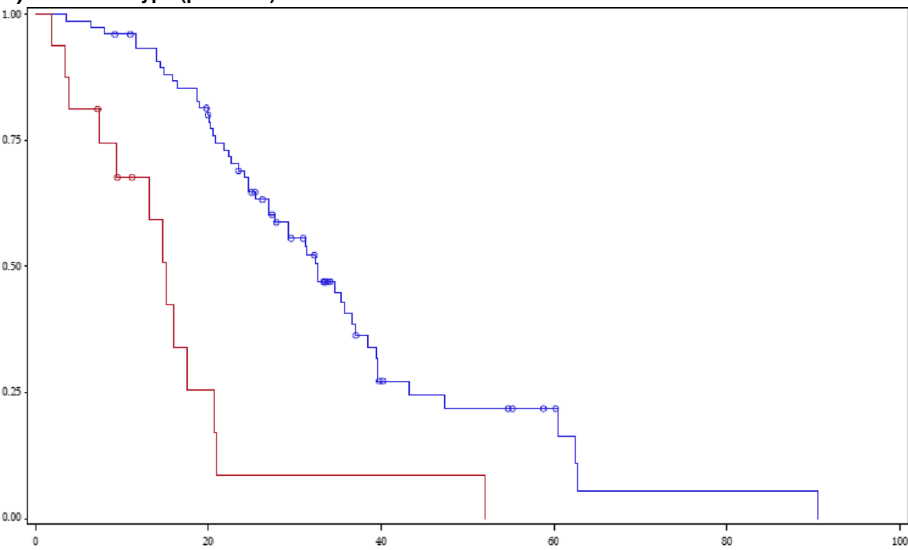

**b) KRAS mutated ( $p=0.64$ )**

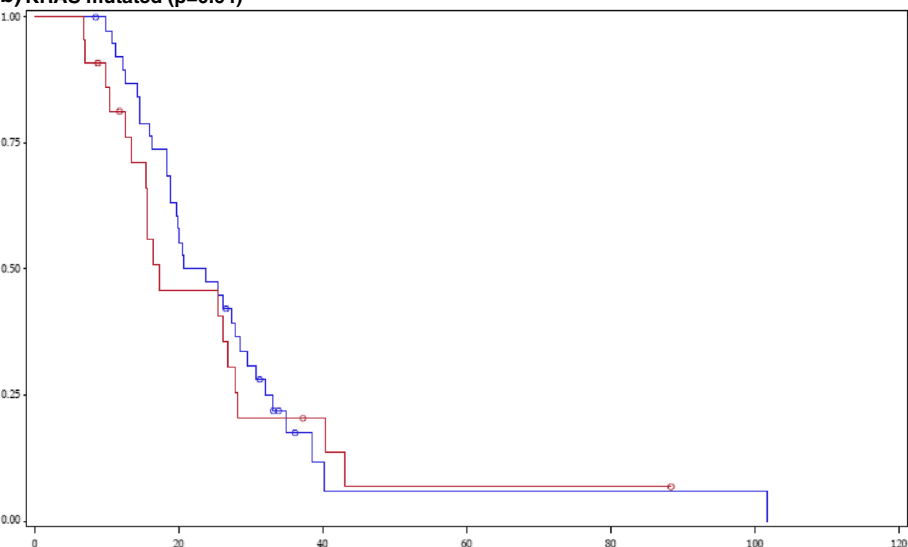

Supplement: MOESM2 [file 9465440]
